# Supplementary material
Source: PubMed Central journal article supplement (PMC4636736)

A

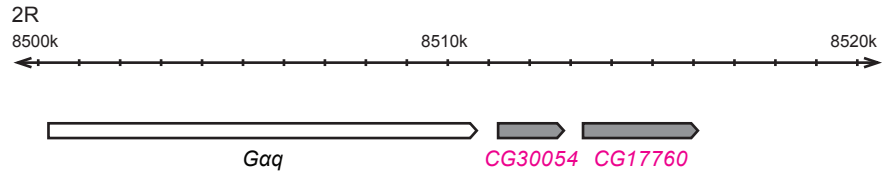

B

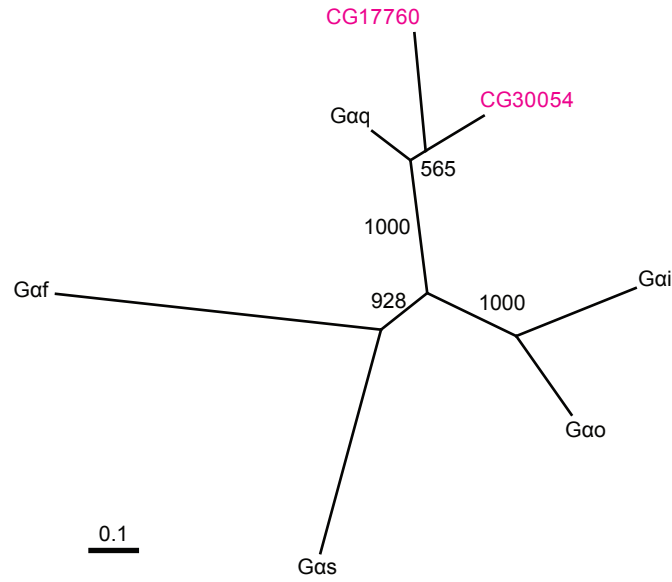

C

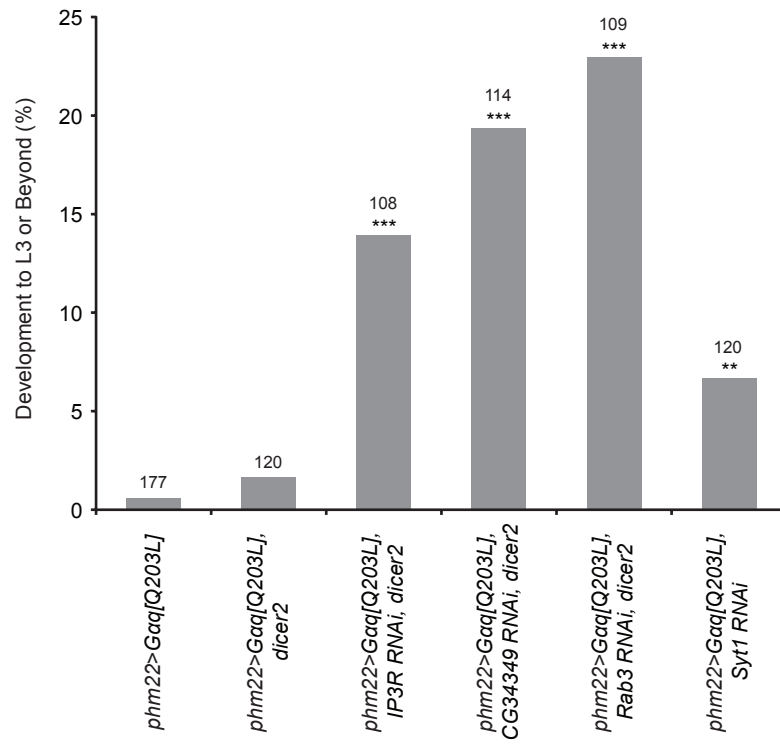

Supplement: NIHMS730294-supplement-1.pdf [file NIHMS730294-supplement-1.pdf]

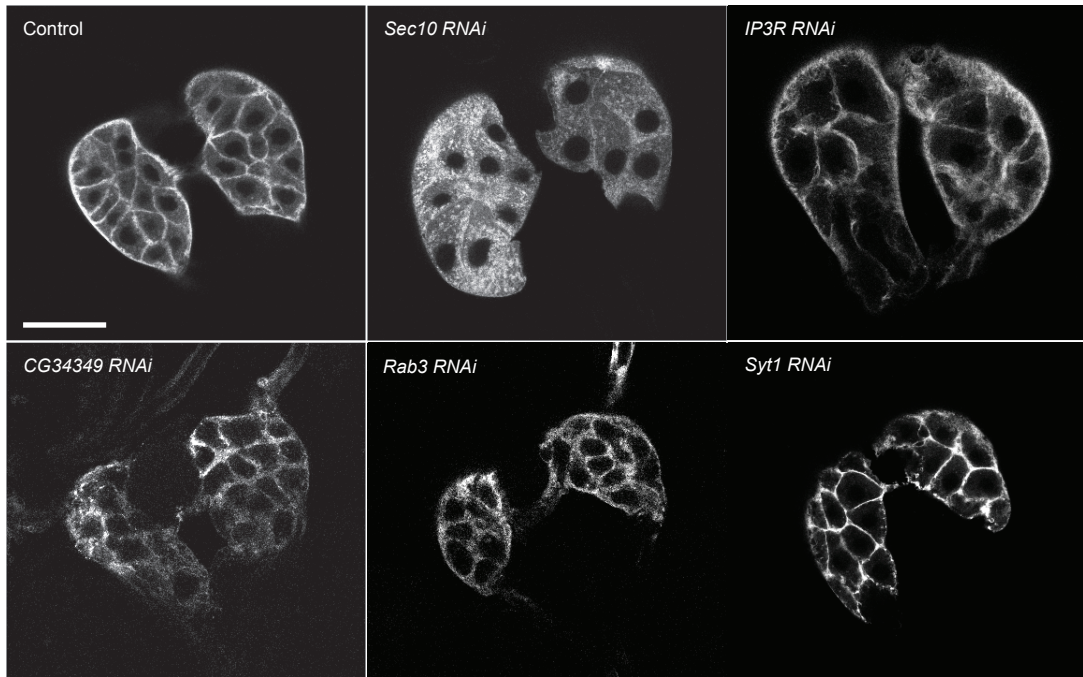

Supplement: NIHMS730294-supplement-2.pdf [file NIHMS730294-supplement-2.pdf]

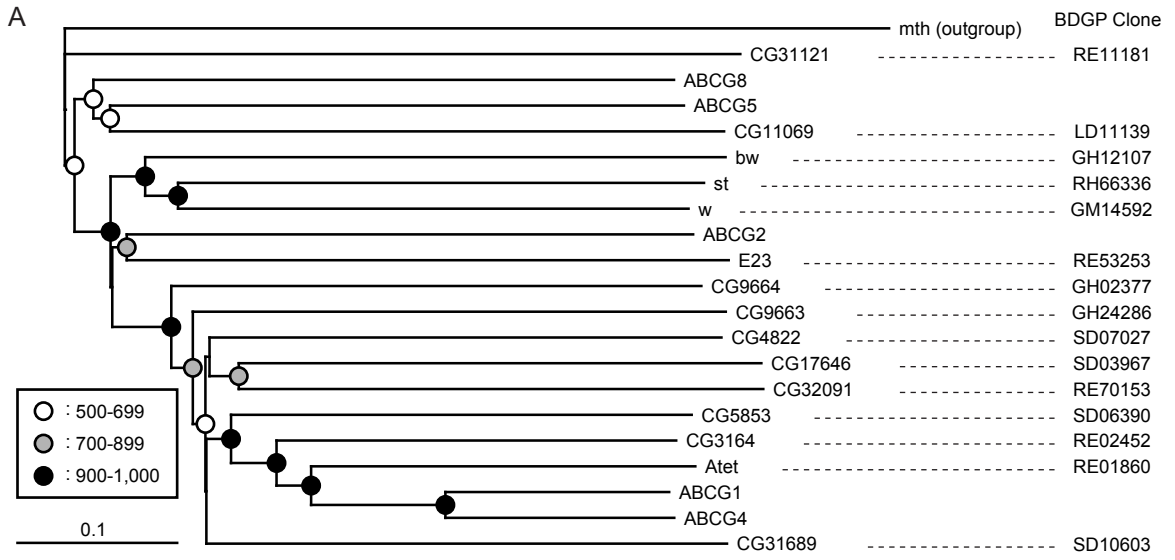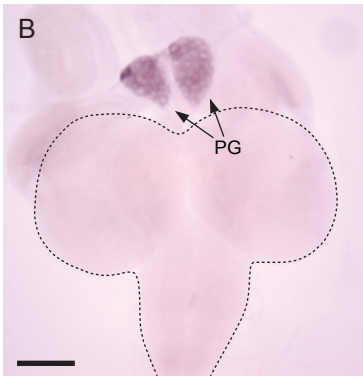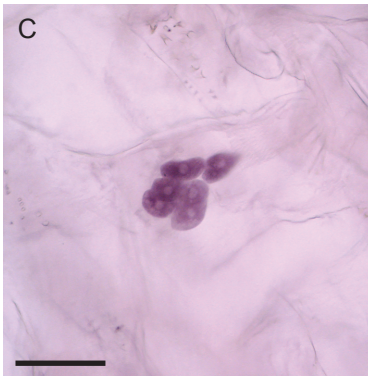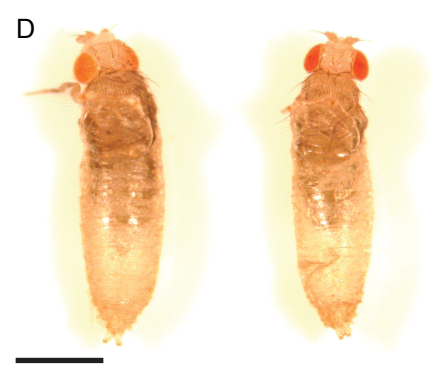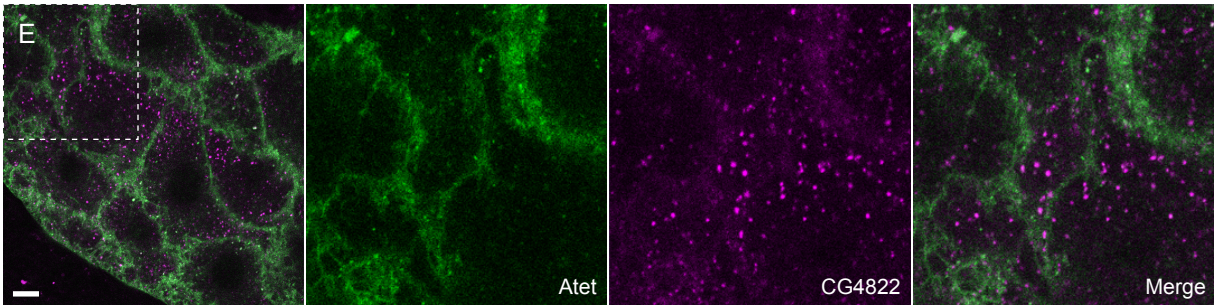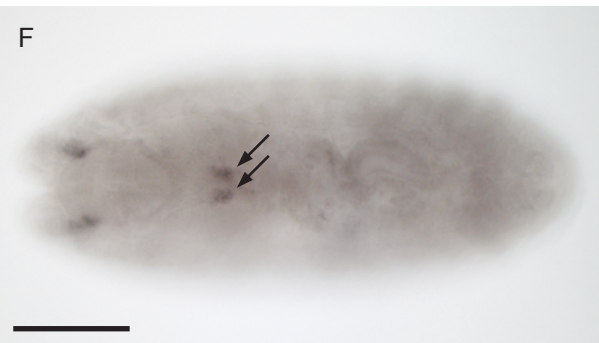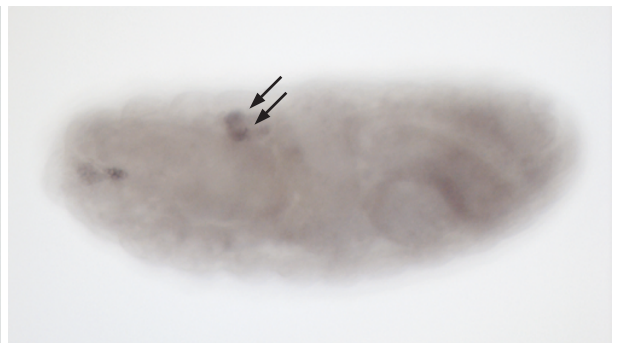

Supplement: NIHMS730294-supplement-3.pdf [file NIHMS730294-supplement-3.pdf]

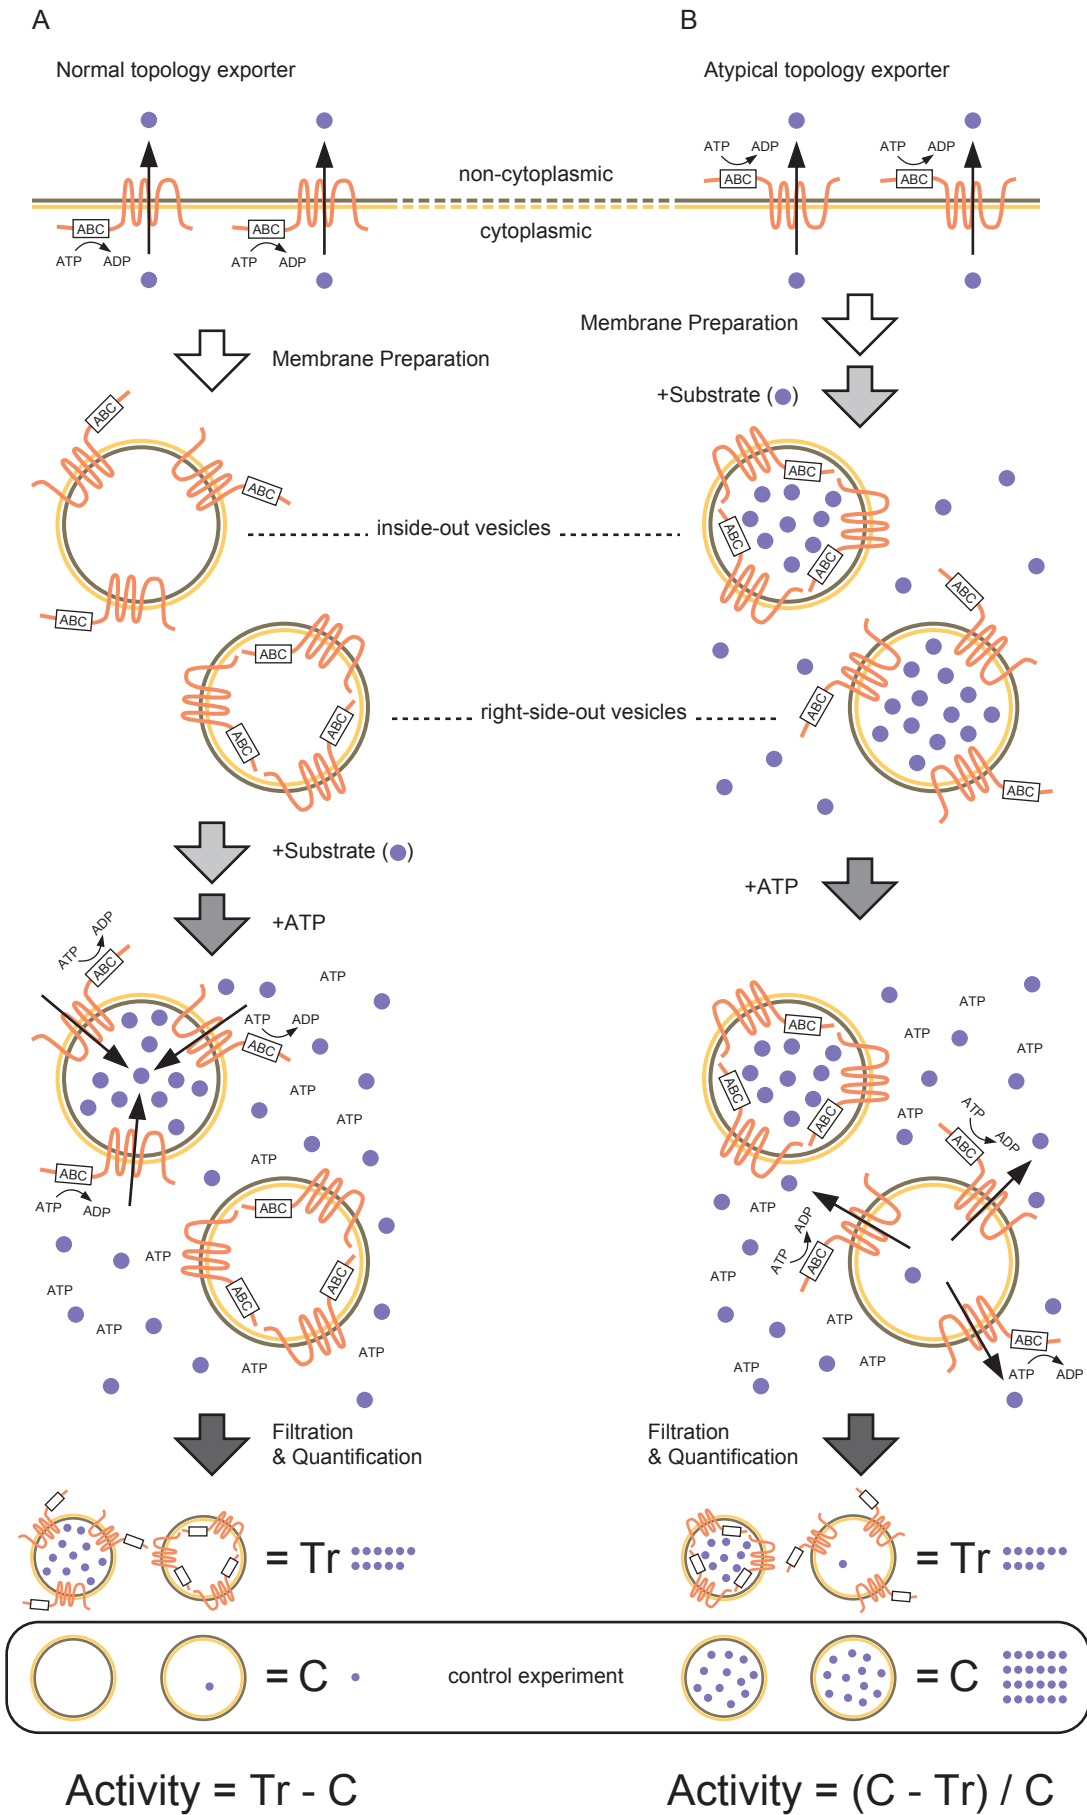

Supplement: NIHMS730294-supplement-4.pdf [file NIHMS730294-supplement-4.pdf]
